# Supplementary material for: Frailty Index and functional level upon admission predict hospital outcomes: an interRAI-based cohort study of older patients in post-acute care hospitals
Source: PubMed Central journal article supplement (PMC7201739; doi:10.1186/s12877-020-01550-7), 2020-05-05
Supplement: 12877_2020_1550_MOESM1_ESM.pdf [file 12877_2020_1550_MOESM1_ESM.pdf]

## Additional file 1. Frailty Index Post-Acute Care

|                             | icode | Question                                   | Value Labels                                                                                                                                             | InterRAI Cut Offs   | FI score      | Running Denominator |
|-----------------------------|-------|--------------------------------------------|----------------------------------------------------------------------------------------------------------------------------------------------------------|---------------------|---------------|---------------------|
| C. Cognition                | iC1   | Cognitive skills for daily decision making | 0 Independent<br>1 Modified independence<br>2 Minimally impaired<br>3 Moderately impaired<br>4 Severely impaired<br>5 No discernible consciousness, coma | 0<br>1 – 2<br>3 - 5 | 0<br>0.5<br>1 | 1                   |
|                             | iC2a  | Short term memory                          | 0 Memory OK<br>1 Memory problem                                                                                                                          | 0<br>1              | 0<br>1        | 2                   |
|                             | iC2b  | Long term memory                           | 0 Memory OK<br>1 Memory problem                                                                                                                          | 0<br>1              | 0<br>1        | 3                   |
|                             | iC2c  | Procedural memory                          | 0 Memory OK<br>1 Memory problem                                                                                                                          | 0<br>1              | 0<br>1        | 4                   |
|                             | iC2d  | Situational memory                         | 0 Memory OK<br>1 Memory problem                                                                                                                          | 0<br>1              | 0<br>1        | 5                   |
|                             | iC3a  | Easily distracted                          | 0 Behaviour not present<br>1 Behaviour present, consistent with usual functioning<br>2 Behaviour present, different from usual functioning               | 0<br>1 - 2          | 0<br>1        | 6                   |
|                             | iC3b  | Disorganised speech                        | 0 Behaviour not present<br>1 Behaviour present, consistent with usual functioning<br>2 Behaviour present, different from usual functioning               | 0<br>1 - 2          | 0<br>1        | 7                   |
|                             | iC3c  | Mental function varies over course of day  | 0 Behaviour not present<br>1 Behaviour present, consistent with usual functioning<br>2 Behaviour present, different from usual functioning               | 0<br>1 - 2          | 0<br>1        | 8                   |
|                             | iC4   | Acute change in mental status              | 0 No<br>1 Yes                                                                                                                                            | 0<br>1              | 0<br>1        | 9                   |
| D. Communication and Vision | iD3   | Hearing                                    | 0 Adequate<br>1 Minimal difficulty<br>2 Moderate difficulty<br>3 Severe difficulty<br>4 No hearing                                                       | 0<br>1<br>2 - 4     | 0<br>0.5<br>1 | 10                  |
|                             | iD5   | Vision                                     | 0 Adequate<br>1 Minimal difficulty<br>2 Moderate difficulty<br>3 Severe difficulty<br>4 No vision                                                        | 0<br>1<br>2 - 4     | 0<br>0.5<br>1 | 11                  |

|                       | <b>icode</b> | <b>Question</b>                                                                     | <b>Value Labels</b>                                                                                                                                                                                                                                                                                            | <b>InterRAI Cut Offs</b>       | <b>FI score</b>       | <b>Running Denominator</b> |
|-----------------------|--------------|-------------------------------------------------------------------------------------|----------------------------------------------------------------------------------------------------------------------------------------------------------------------------------------------------------------------------------------------------------------------------------------------------------------|--------------------------------|-----------------------|----------------------------|
| E. Mood and Behaviour | iE1a-g       | Indicators of depression, anxiety or sad mood<br><br>Depression Rating Scale (0-14) | Calculate the Depression Rating Scale                                                                                                                                                                                                                                                                          | DRS 0<br>DRS 1-2<br>DRS ≥3     | 0<br>0.5<br>1         | 12                         |
|                       | iE3b-d,f     | Indicators of behaviour symptoms<br><br>Aggressive Behaviour Scale (0-12)           | Calculate the Aggressive Behaviour Scale                                                                                                                                                                                                                                                                       | ABS 0<br>ABS 1-3<br>ABS ≥4     | 0<br>0.5<br>1         | 13                         |
| F. Functional status  | iF1a         | Bathing                                                                             | 0 Independent<br>1 Independent, setup help only<br>2 Supervision- oversight, cueing<br>3 Limited assistance- guided manoeuvring of limbs<br>4 Extensive assistance- 1 person weight bearing support<br>5 Maximal assistance- 2 person weight bearing support<br>6 Total dependence<br>8 Activity did not occur | 0 - 1<br><br>2<br><br>3 – 6, 8 | 0<br><br>0.5<br><br>1 | 14                         |
|                       | iF1b         | Personal hygiene                                                                    | 0 Independent<br>1 Independent, setup help only<br>2 Supervision- oversight, cueing<br>3 Limited assistance- guided manoeuvring of limbs<br>4 Extensive assistance- 1 person weight bearing support<br>5 Maximal assistance- 2 person weight bearing support<br>6 Total dependence<br>8 Activity did not occur | 0–1<br><br>2<br><br>3 – 6, 8   | 0<br><br>0.5<br><br>1 | 15                         |
|                       | iF1c         | Dressing upper body                                                                 | 0 Independent<br>1 Independent, setup help only<br>2 Supervision- oversight, cueing<br>3 Limited assistance- guided manoeuvring of limbs<br>4 Extensive assistance- 1 person weight bearing support<br>5 Maximal assistance- 2 person weight bearing support<br>6 Total dependence<br>8 Activity did not occur | 0 - 1<br><br>2<br><br>3 – 6, 8 | 0<br><br>0.5<br><br>1 | 16                         |
|                       | iF1d         | Dressing lower body                                                                 | 0 Independent<br>1 Independent, setup help only<br>2 Supervision- oversight, cueing<br>3 Limited assistance- guided manoeuvring of limbs<br>4 Extensive assistance- 1 person weight bearing support<br>5 Maximal assistance- 2 person weight bearing support<br>6 Total dependence<br>8 Activity did not occur | 0 - 1<br><br>2<br><br>3 – 6, 8 | 0<br><br>0.5<br><br>1 | 17                         |

|               | icode | Question           | Value Labels                                                                                                                                                                                                                                                                                                   | InterRAI Cut Offs               | FI score              | Running Denominator |
|---------------|-------|--------------------|----------------------------------------------------------------------------------------------------------------------------------------------------------------------------------------------------------------------------------------------------------------------------------------------------------------|---------------------------------|-----------------------|---------------------|
| G. Contenance | iG1   | Bladder continence | 0 Continent<br>1 Control with catheter or ostomy<br>2 Infrequently incontinent<br>3 Occasionally incontinent<br>4 Frequently incontinent<br>5 Incontinent<br>8 Did not occur – no urine output in last 3 days                                                                                                  | 0 – 1<br><br>2 – 3<br><br>4,5,8 | 0<br><br>0.5<br><br>1 | 33                  |
|               | iF1g  | Toilet Transfers   | 0 Independent<br>1 Independent, setup help only<br>2 Supervision- oversight, cueing<br>3 Limited assistance- guided manoeuvring of limbs<br>4 Extensive assistance- 1 person weight bearing support<br>5 Maximal assistance- 2 person weight bearing support<br>6 Total dependence<br>8 Activity did not occur | 0 – 1<br><br>2<br><br>3 – 6, 8  | 0<br><br>0.5<br><br>1 | 19                  |
|               | iF1h  | Toilet use         | 0 Independent<br>1 Independent, setup help only<br>2 Supervision- oversight, cueing<br>3 Limited assistance- guided manoeuvring of limbs<br>4 Extensive assistance- 1 person weight bearing support<br>5 Maximal assistance- 2 person weight bearing support<br>6 Total dependence<br>8 Activity did not occur | 0 – 1<br><br>2<br><br>3 – 6, 8  | 0<br><br>0.5<br><br>1 | 20                  |
|               | iF1i  | Bed mobility       | 0 Independent<br>1 Independent, setup help only<br>2 Supervision- oversight, cueing<br>3 Limited assistance- guided manoeuvring of limbs<br>4 Extensive assistance- 1 person weight bearing support<br>5 Maximal assistance- 2 person weight bearing support<br>6 Total dependence<br>8 Activity did not occur | 0 – 1<br><br>2<br><br>3 – 6, 8  | 0<br><br>0.5<br><br>1 | 21                  |
|               | iF1j  | Eating             | 0 Independent<br>1 Independent, setup help only<br>2 Supervision- oversight, cueing<br>3 Limited assistance- guided manoeuvring of limbs<br>4 Extensive assistance- 1 person weight bearing support<br>5 Maximal assistance- 2 person weight bearing support<br>6 Total dependence<br>8 Activity did not occur | 0 – 1<br><br>2<br><br>3 – 6, 8  | 0<br><br>0.5<br><br>1 | 22                  |

|              | <b>icode</b> | <b>Question</b>                    | <b>Value Labels</b>                                                                                                                                                                                           | <b>InterRAI Cut Offs</b>                 | <b>FI score</b>   | <b>Running Denominator</b> |
|--------------|--------------|------------------------------------|---------------------------------------------------------------------------------------------------------------------------------------------------------------------------------------------------------------|------------------------------------------|-------------------|----------------------------|
|              | iF2a         | Mode of locomotion                 | 0 Walking, no assistive device<br>1 Walking, uses assistive device<br>2 Wheelchair, scooter<br>3 Bedbound                                                                                                     | 0<br>1<br>2 - 3                          | 0<br>0.5<br>1     | 23                         |
|              | iF2b         | Walking speed                      | Count Timed 4-meter walk distance (m)/ walking time (s)                                                                                                                                                       | >= 0,8 m/s<br>< 0,8 m/s<br>Not performed | 0<br>1<br>1       | 24                         |
|              | iG1          | Bladder continence                 | 0 Continent<br>1 Control with catheter or ostomy<br>2 Infrequently incontinent<br>3 Occasionally incontinent<br>4 Frequently incontinent<br>5 Incontinent<br>8 Did not occur – no urine output in last 3 days | 0 – 1<br><br>2 – 3<br>4,5,8              | 0<br><br>0.5<br>1 | 25                         |
|              | iG4          | Bowel continence                   | 0 Continent<br>1 Control with ostomy<br>2 Infrequently incontinent<br>3 Occasionally incontinent<br>4 Frequently incontinent<br>5 Incontinent<br>8 Did not occur – no bowel movement in last 3 days           | 0 – 1<br><br>2 – 3<br>4,5,8              | 0<br><br>0.5<br>1 | 26                         |
| H. Diagnoses | iH1a         | Hip fracture during last 30 days   | 0 Not present<br>1 Primary diagnosis of current stay<br>2 Diagnosis present, receiving active treatment<br>3 Diagnosis present, monitored but no active treatment                                             | 0<br>1-3                                 | 0<br>1            | 27                         |
|              | iH1b         | Other fracture during last 30 days | 0 Not present<br>1 Primary diagnosis of current stay<br>2 Diagnosis present, receiving active treatment<br>3 Diagnosis present, monitored but no active treatment                                             | 0<br>1-3                                 | 0<br>1            | 28                         |
|              | iH1c         | Alzheimers disease                 | 0 Not present<br>1 Primary diagnosis of current stay<br>2 Diagnosis present, receiving active treatment<br>3 Diagnosis present, monitored but no active treatment                                             | 0<br>1-3                                 | 0<br>1            | 29                         |
|              | iH1d         | Dementia other than ALZ            | 0 Not present<br>1 Primary diagnosis of current stay<br>2 Diagnosis present, receiving active treatment<br>3 Diagnosis present, monitored but no active treatment                                             | 0<br>1-3                                 | 0<br>1            | 30                         |

|                             | <b>icode</b> | <b>Question</b>          | <b>Value Labels</b>                                                                                                                                               | <b>InterRAI Cut Offs</b> | <b>FI score</b> |    |
|-----------------------------|--------------|--------------------------|-------------------------------------------------------------------------------------------------------------------------------------------------------------------|--------------------------|-----------------|----|
|                             | iH1h         | Parkinson's disease      | 0 Not present<br>1 Primary diagnosis of current stay<br>2 Diagnosis present, receiving active treatment<br>3 Diagnosis present, monitored but no active treatment | 0<br>1-3                 | 0<br>1          | 31 |
|                             | iH1j         | Stroke/ SVA              | 0 Not present<br>1 Primary diagnosis of current stay<br>2 Diagnosis present, receiving active treatment<br>3 Diagnosis present, monitored but no active treatment | 0<br>1-3                 | 0<br>1          | 32 |
|                             | iH1k         | Coronary heart disease   | 0 Not present<br>1 Primary diagnosis of current stay<br>2 Diagnosis present, receiving active treatment<br>3 Diagnosis present, monitored but no active treatment | 0<br>1-3                 | 0<br>1          | 33 |
|                             | iH1l         | Congestive heart failure | 0 Not present<br>1 Primary diagnosis of current stay<br>2 Diagnosis present, receiving active treatment<br>3 Diagnosis present, monitored but no active treatment | 0<br>1-3                 | 0<br>1          | 34 |
|                             | iH1m         | COPD                     | 0 Not present<br>1 Primary diagnosis of current stay<br>2 Diagnosis present, receiving active treatment<br>3 Diagnosis present, monitored but no active treatment | 0<br>1-3                 | 0<br>1          | 35 |
|                             | iH1n         | Anxiety                  | 0 Not present<br>1 Primary diagnosis of current stay<br>2 Diagnosis present, receiving active treatment<br>3 Diagnosis present, monitored but no active treatment | 0<br>1-3                 | 0<br>1          | 36 |
|                             | iH1p         | Depression               | 0 Not present<br>1 Primary diagnosis of current stay<br>2 Diagnosis present, receiving active treatment<br>3 Diagnosis present, monitored but no active treatment | 0<br>1-3                 | 0<br>1          | 37 |
|                             | iH1t         | Cancer                   | 0 Not present<br>1 Primary diagnosis of current stay<br>2 Diagnosis present, receiving active treatment<br>3 Diagnosis present, monitored but no active treatment | 0<br>1-3                 | 0<br>1          | 38 |
|                             | iH1u         | Diabetes                 | 0 Not present<br>1 Primary diagnosis of current stay<br>2 Diagnosis present, receiving active treatment<br>3 Diagnosis present, monitored but no active treatment | 0<br>1-3                 | 0<br>1          | 39 |
| <b>I. Health Conditions</b> | il1          | Falls                    | 0 No fall in last 90 days<br>1 No fall in last 30 days but fell 31-90 days ago<br>2 One fall in last 30 days<br>3 Two or more falls in last 30 days               | 0<br>1<br>2, 3           | 0<br>0.5<br>1   | 40 |

| icode | Question                                       | Value Labels                                                                                                                                                       | InterRAI Cut Offs | FI score      | Running Denominator |
|-------|------------------------------------------------|--------------------------------------------------------------------------------------------------------------------------------------------------------------------|-------------------|---------------|---------------------|
| il3a  | Balance: Difficult to move self to standing    | 0 Not present<br>1 Present but not exhibited last 3 days<br>2 Exhibited on 1 of last 3 days<br>3 Exhibited on 2 of last 3 days<br>4 Exhibited daily in last 3 days | 0<br>1-4          | 0<br>1        | 41                  |
| il3b  | Balance: Difficult to turn self around         | 0 Not present<br>1 Present but not exhibited last 3 days<br>2 Exhibited on 1 of last 3 days<br>3 Exhibited on 2 of last 3 days<br>4 Exhibited daily in last 3 days | 0<br>1-4          | 0<br>1        | 42                  |
| il3c  | Dizziness                                      | 0 Not present<br>1 Present but not exhibited last 3 days<br>2 Exhibited on 1 of last 3 days<br>3 Exhibited on 2 of last 3 days<br>4 Exhibited daily in last 3 days | 0<br>1-4          | 0<br>1        | 43                  |
| il3d  | Unsteady gait                                  | 0 Not present<br>1 Present but not exhibited last 3 days<br>2 Exhibited on 1 of last 3 days<br>3 Exhibited on 2 of last 3 days<br>4 Exhibited daily in last 3 days | 0<br>1-4          | 0<br>1        | 44                  |
| i3l   | Constipation                                   | 0 Not present<br>1 Present but not exhibited last 3 days<br>2 Exhibited on 1 of last 3 days<br>3 Exhibited on 2 of last 3 days<br>4 Exhibited daily in last 3 days | 0<br>1-4          | 0<br>1        | 45                  |
| il3o  | Difficulty falling asleep                      | 0 Not present<br>1 Present but not exhibited last 3 days<br>2 Exhibited on 1 of last 3 days<br>3 Exhibited on 2 of last 3 days<br>4 Exhibited daily in last 3 days | 0<br>1-4          | 0<br>1        | 46                  |
| il4   | Dyspnoea                                       | 0 Absence of symptom<br>1 Absent at rest, but present with moderate activity<br>2 Absent at rest, but present with normal activity<br>3 Present at rest            | 0<br>1-3          | 0<br>1        | 47                  |
| il5   | Fatigue- inability to complete normal activity | 0 None<br>1 Minimal<br>2 Moderate<br>3 Severe<br>4 Unable to commence any day-to-day activity                                                                      | 0<br>1<br>2 - 4   | 0<br>0.5<br>1 | 48                  |

|                                | icode           | Question                                                                                                    | Value Labels                                                                                                                                                                                                                                                                                                                                                                                                 | InterRAI Cut Offs            | FI score      | Running Denominator |
|--------------------------------|-----------------|-------------------------------------------------------------------------------------------------------------|--------------------------------------------------------------------------------------------------------------------------------------------------------------------------------------------------------------------------------------------------------------------------------------------------------------------------------------------------------------------------------------------------------------|------------------------------|---------------|---------------------|
|                                | i6a-b           | Indicators of pain<br>PAIN-scale (0-4)                                                                      | Calculate the PAIN-scale                                                                                                                                                                                                                                                                                                                                                                                     | PAIN 0<br>PAIN 1<br>PAIN 2-4 | 0<br>0.5<br>1 | 49                  |
|                                | il7c            | End-stage disease                                                                                           | 0 No<br>1 Yes                                                                                                                                                                                                                                                                                                                                                                                                | 0<br>1                       | 0<br>1        | 50                  |
| J. Oral and Nutritional Status | iJ1ab,<br>iJ1bb | Calculate BMI                                                                                               | BMI                                                                                                                                                                                                                                                                                                                                                                                                          | 20 - 30<br>< 20 or >30       | 0<br>1        | 51                  |
|                                | iJ2a            | Weight loss of 5% or more in last 30 days,<br>10% or more in last 180 days                                  | 0 No<br>1 Yes                                                                                                                                                                                                                                                                                                                                                                                                | 0<br>1                       | 0<br>1        | 52                  |
|                                | iJ2b            | Dehydrated                                                                                                  | 0 No<br>1 Yes                                                                                                                                                                                                                                                                                                                                                                                                | 0<br>1                       | 0<br>1        | 53                  |
|                                | iJ3             | Mode of intake                                                                                              | 0 Normal<br>1 Modified independent –limited solid food<br>2 Requires diet modification to swallow solid food<br>3 Requires diet modification to swallow liquids<br>4 Can swallow only pureed solids and thickened fluids<br>5 Combined oral and parenteral or tube feeding<br>6 Nasogastric tube feeding only<br>7 Abdominal feeding tube e.g. PEG<br>8. Parenteral feeding only<br>9 Activity did not occur | 0<br>1-2<br>3 - 9            | 0<br>0.5<br>1 | 54                  |
| K. Skin                        | iK1-<br>iK2     | Pressure ulcer-current or prior                                                                             | 0 No<br>1 Yes                                                                                                                                                                                                                                                                                                                                                                                                | 0<br>1                       | 0<br>1        | 55                  |
|                                | iK3-<br>iK6     | Skin problems (any of presence of skin<br>ulcer, major skin problem, skin tears, other<br>skin conditions ) | 0<br>≥1                                                                                                                                                                                                                                                                                                                                                                                                      | 0<br>1                       | 0<br>1        | 56                  |
|                                | iK7             | Foot problems                                                                                               | 0 No foot problems<br>1 Foot problems, no limitation in walking<br>2 Foot problems limit walking<br>3 Foot problems prevent walking<br>4 Foot problems, does not walk for other reasons                                                                                                                                                                                                                      | 0<br>1-4                     | 0<br>1        | 57                  |

The denominator from PAC ITEMS is 57. For complete interRAI PAC forms, the individual's FI is calculated by dividing their number of deficits by 57. The denominator can be adjusted for missing items.
